# Supplementary material for: Increasing chlamydia screening tests in general practice: a modified Zelen prospective Cluster Randomised Controlled Trial evaluating a complex intervention based on the Theory of Planned Behaviour
Source: HighWire-hosted journal article supplement (doi:10.1136/sextrans-2013-051029), 2013-09-04

Figure 1: Web only Practice recruitment

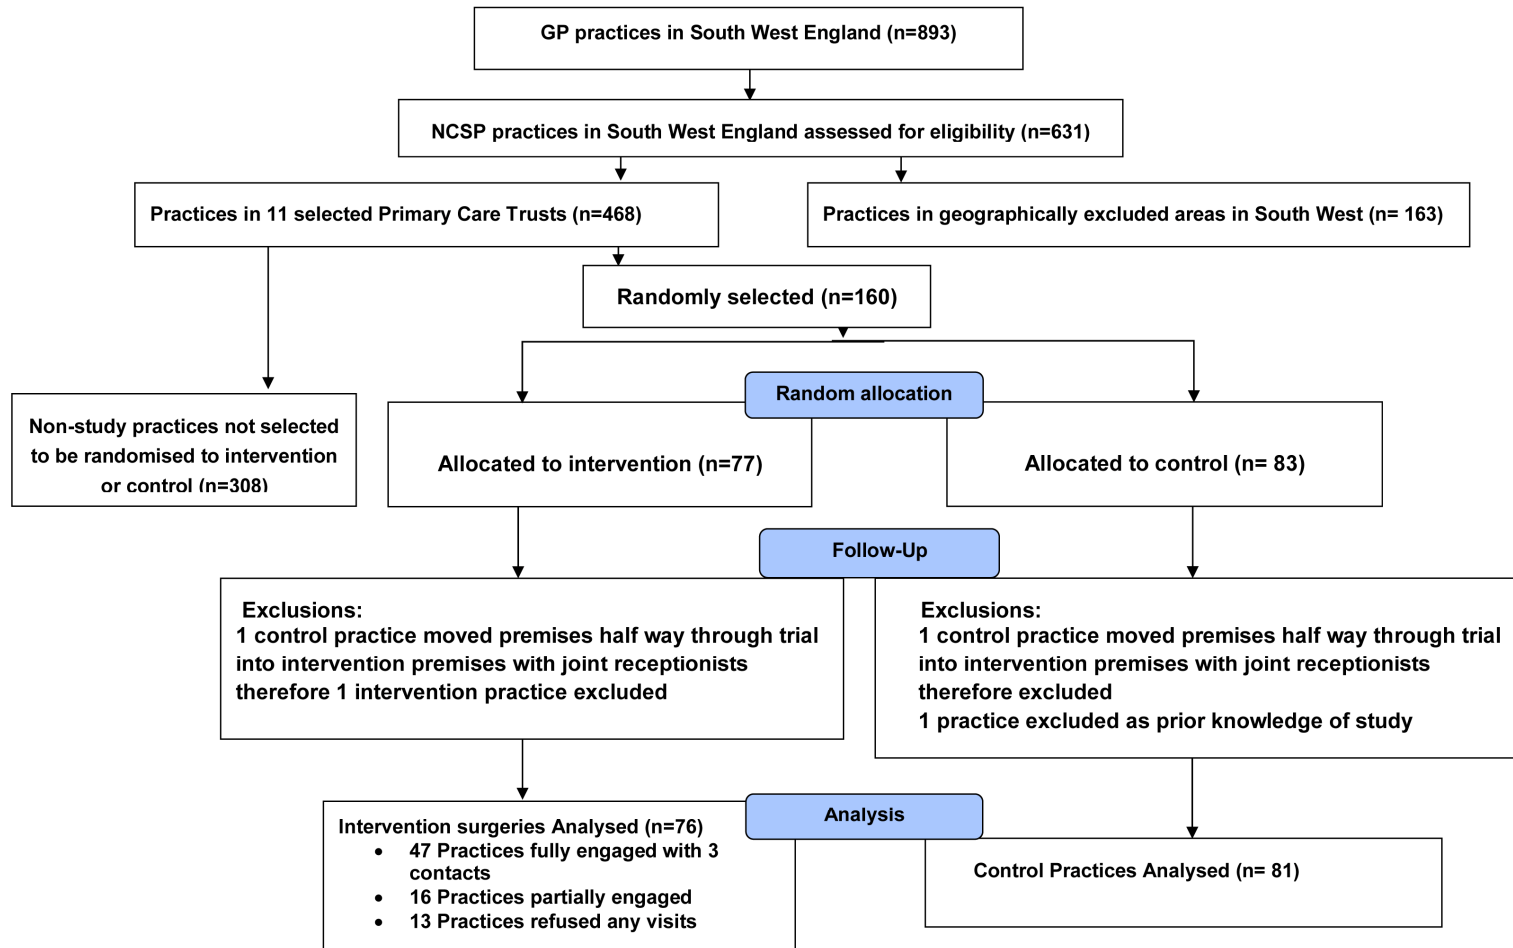

**Figure 3: Chlamydia testing /100 registered 15-24 year olds/ year by month in period before, during intervention from April 10 and nine months after the intervention in practices registered with the NCSP in geographical area in the South West**

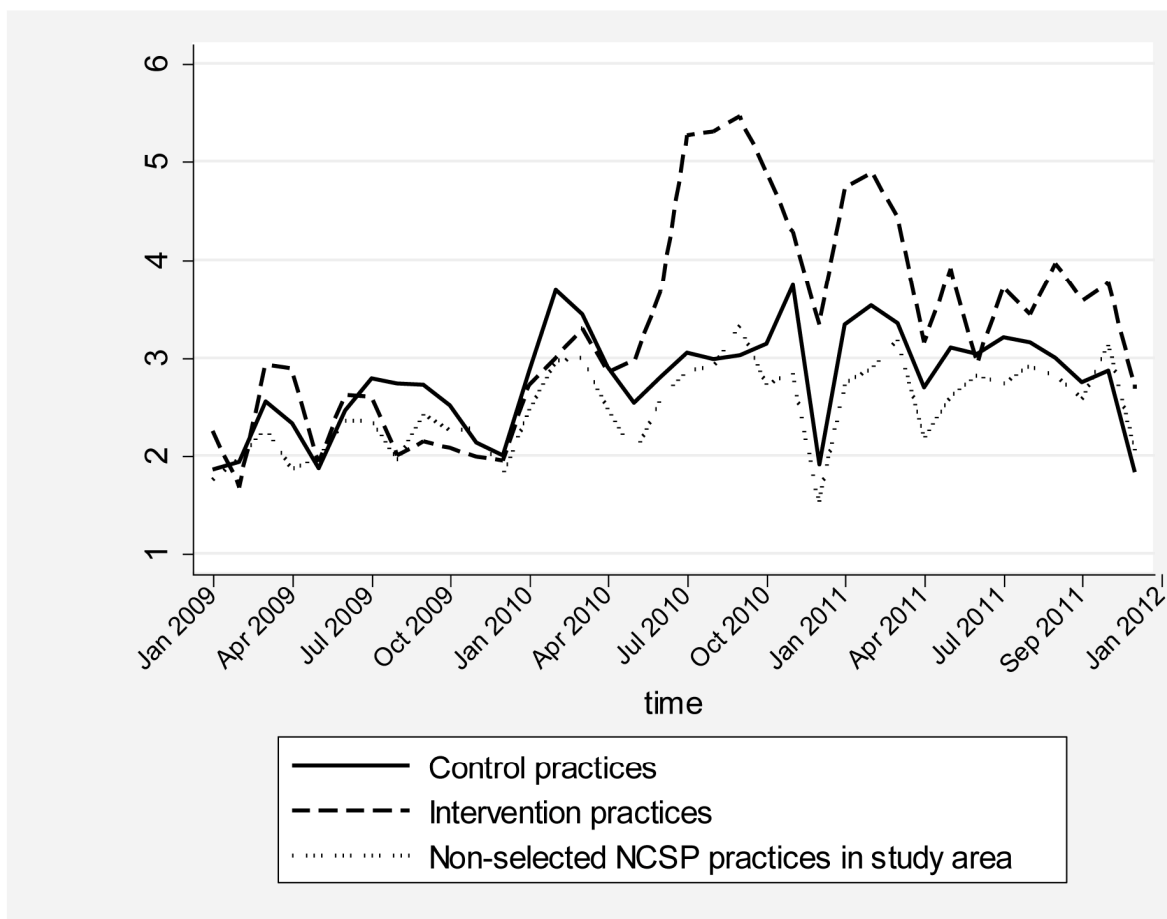

Supplement: sextrans-2013-051029supp_figures.pdf [file sextrans-2013-051029supp_figures.pdf]
